# Supplementary material for: Depression symptoms as longitudinal predictors of the psychological impact of COVID-19 pandemic in hypertensive patients
Source: PubMed Central journal article supplement (PMC8363734; doi:10.1038/s41598-021-96165-2), 2021-08-13
Supplement: 41598_2021_96165_MOESM1_ESM.pdf [file 41598_2021_96165_MOESM1_ESM.pdf]

## Appendix. Statistical Analyses

| Variable                          | Non-participants<br>(n=127, 54.7%) | Participants<br>(n=105, 45.3%) | t     | $\chi^2$ | P value |
|-----------------------------------|------------------------------------|--------------------------------|-------|----------|---------|
| Age (years)                       | 72.1±6.9                           | 69.5±5.8                       | 3.047 |          | .003    |
| Gender                            |                                    |                                |       | .975     | .353    |
| Male                              | 68(53.5%)                          | 63(60.0%)                      |       |          |         |
| Female                            | 59(46.5%)                          | 42(40.0%)                      |       |          |         |
| Time since hypertension diagnosis |                                    |                                |       | .509     | .503    |
| Less than 10 years                | 22(19.6%)                          | 23(23.7%)                      |       |          |         |
| 10 years or more                  | 90(80.4%)                          | 74(76.3%)                      |       |          |         |
| HADS                              |                                    |                                |       |          |         |
| Anxiety (baseline)                | 7.7±4.1                            | 7.1±3.7                        | 1.280 |          | .202    |
| Depression (baseline)             | 5.7±3.3                            | 4.3±3.0                        | 3.541 |          | <.001   |

Groups comparisons between non-participating patients and participating patients for age, gender, time since hypertension diagnosis, and baseline anxiety and depression symptoms. Unpaired-samples t-test (*t*) and chi-squared ( $\chi^2$ ) test were performed for continuous and categorical variables, respectively. HADS, Hospital Anxiety Depression Scale.

| Variable               | Skewness |      | Kurtosis |      |
|------------------------|----------|------|----------|------|
|                        | Estimate | SE   | Estimate | SE   |
| HADS                   |          |      |          |      |
| Anxiety (baseline)     | .565     | .236 | .003     | .467 |
| Depression (baseline)  | .574     | .236 | -.448    | .467 |
| Anxiety (follow-up)    | .975     | .236 | .315     | .467 |
| Depression (follow-up) | 1.601    | .236 | 2.199    | .467 |
| IES-R                  | 1.226    | .237 | 1.604    | .469 |

Results from normal distribution analysis. Normality ranges of  $\pm 2$  and  $\pm 7$  were considered for skewness and kurtosis, respectively. Estimates and standard errors (SE) are reported for each variable. HADS, Hospital Anxiety Depression Scale. IES-R, Impact of Event Scale-Revised.

|                                  | 1      | 2      | 3      | 4      | 5 |
|----------------------------------|--------|--------|--------|--------|---|
| <b>1. Anxiety (baseline)</b>     | -      |        |        |        |   |
| <b>2. Depression (baseline)</b>  | .610** | -      |        |        |   |
| <b>3. Anxiety (follow-up)</b>    | .418** | .352** | -      |        |   |
| <b>4. Depression (follow-up)</b> | .291*  | .514** | .505** | -      |   |
| <b>5. IES-R</b>                  | .317*  | .373** | .271*  | .476** | - |

Correlations among baseline and follow-up anxiety and depression and pandemic-related psychological distress.

\* p value <.01, \*\* p value <.001

IES-R, Impact of Event Scale-Revised

| Model | R    | R Square | Adjusted R Square | Std Error of the Estimate |
|-------|------|----------|-------------------|---------------------------|
| 1     | .519 | .269     | .211              | 11.49                     |

Model 1 summary.

Dependent Variable: pandemic-related psychological distress (IES-R)

Predictors: age, gender, living condition, employment status, time since hypertension diagnosis, baseline anxiety and depression

| Model |            | Sum of Squares | Degree of Freedom | Mean Square | F     | P value |
|-------|------------|----------------|-------------------|-------------|-------|---------|
| 1     | Regression | 4279.714       | 7                 | 611.388     | 4.630 | <.001   |
|       | Residual   | 11621.244      | 88                | 132.060     |       |         |
|       | Total      | 159000.958     | 95                |             |       |         |

ANOVA, Model 1 fit.

Dependent Variable: pandemic-related psychological distress (IES-R)

Predictors: age, gender, living condition, employment status, time since hypertension diagnosis, baseline anxiety and depression

|                                   | $\beta$ | t      | 95% CI        | P value |
|-----------------------------------|---------|--------|---------------|---------|
| Age                               | -.246   | -1.175 | -.662 .170    | .243    |
| Gender                            | -.035   | -.014  | -4.902 4.833  | .989    |
| Living conditions                 | -7.274  | -2.072 | -14.250 -.297 | .041    |
| Employment status                 | 4.920   | 1.769  | -.606 10.446  | .080    |
| Time since hypertension diagnosis | -1.313  | -.460  | -6.990 4.363  | .647    |
| HADS Anxiety (baseline)           | .492    | 1.202  | -.321 1.306   | .232    |
| HADS Depression (baseline)        | 1.483   | 2.905  | .468 2.498    | .005    |

Model 1. Multiple linear impact of socio-demographic variables, and baseline anxiety and depression symptoms on IES-R (n=96). Data are the unstandardized regression coefficients ( $\beta$ ), the t-test value (t), and confidence interval (95%)

| Model | R    | R Square | Adjusted R Square | Std Error of the Estimate |
|-------|------|----------|-------------------|---------------------------|
| 2     | .633 | .400     | .338              | 10.52                     |

Model 2 summary.

Dependent Variable: pandemic-related psychological distress (IES-R)

Predictors: age, gender, living condition, employment status, time since hypertension diagnosis, baseline anxiety and depression, anxiety and depression change after 10 years (delta)

| Model |            | Sum of Squares | Degree of Freedom | Mean Square | F     | P value |
|-------|------------|----------------|-------------------|-------------|-------|---------|
| 2     | Regression | 6367.075       | 9                 | 707.453     | 6.382 | <.001   |
|       | Residual   | 9533.884       | 86                | 110.859     |       |         |
|       | Total      | 15900.958      | 95                |             |       |         |

ANOVA, Model 2 fit.

Dependent Variable: pandemic-related psychological distress (IES-R)

Predictors: age, gender, living condition, employment status, time since hypertension diagnosis, baseline anxiety and depression, anxiety and depression change after 10 years (delta)

|                                   | $\beta$ | <i>t</i> | 95% CI  |       | P value |
|-----------------------------------|---------|----------|---------|-------|---------|
| Age                               | -.277   | -1.422   | -.665   | .111  | .159    |
| Gender                            | 1.036   | .457     | -3.468  | 5.540 | .649    |
| Living conditions                 | -3.971  | -1.169   | -10.722 | 2.780 | .245    |
| Employment status                 | 2.526   | .969     | -2.657  | 7.709 | .335    |
| Time since hypertension diagnosis | -1.043  | -.398    | -6.248  | 4.161 | .691    |
| HADS Anxiety (baseline)           | .579    | 1.270    | -.327   | 1.486 | .207    |
| HADS Depression (baseline)        | 2.261   | 4.373    | 1.233   | 3.289 | <.001   |
| HADS Anxiety ( $\Delta$ )         | -.151   | -.385    | -.931   | .629  | .701    |
| HADS Depression ( $\Delta$ )      | -1.640  | -3.765   | -2.506  | -.774 | <.001   |

Model 2. Multiple linear impact of socio-demographic variables, baseline anxiety and depression symptoms, and their change after 10 years on IES-R (n=96). Data are the unstandardized regression coefficients ( $\beta$ ), the t-test value (*t*), and confidence interval (95%).
